# Supplementary material for: Dexamethasone and tocilizumab treatment considerably reduces the value of C-reactive protein and procalcitonin to detect secondary bacterial infections in COVID-19 patients
Source: Springer Nature journal article supplement (doi:10.1186/s13054-021-03717-z), 2021-08-05

## INFECTION SITE

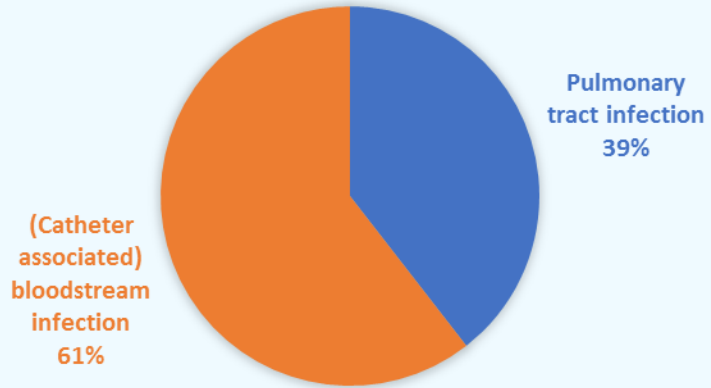

## CAUSATIVE PATHOGENS

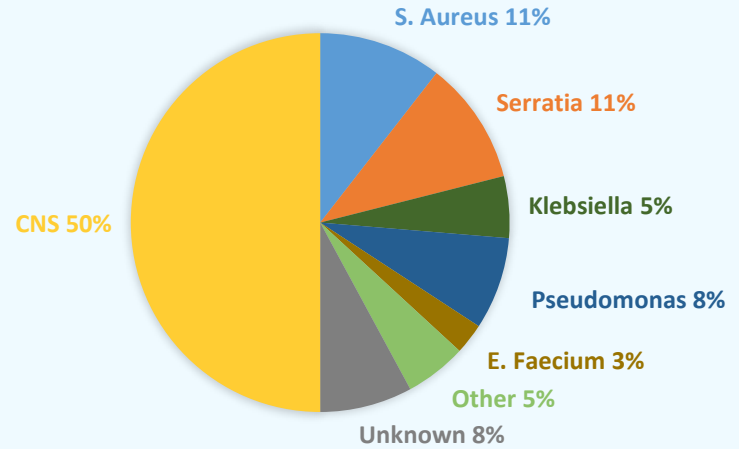

Supplement: MOESM1 [file 19546206]
