# Supplementary material for: Dexamethasone and tocilizumab treatment considerably reduces the value of C-reactive protein and procalcitonin to detect secondary bacterial infections in COVID-19 patients
Source: Springer Nature journal article supplement (doi:10.1186/s13054-021-03717-z), 2021-08-05

■ Early secondary infection ( $\leq 4$  days)

● Late secondary infection ( $>4$  days)

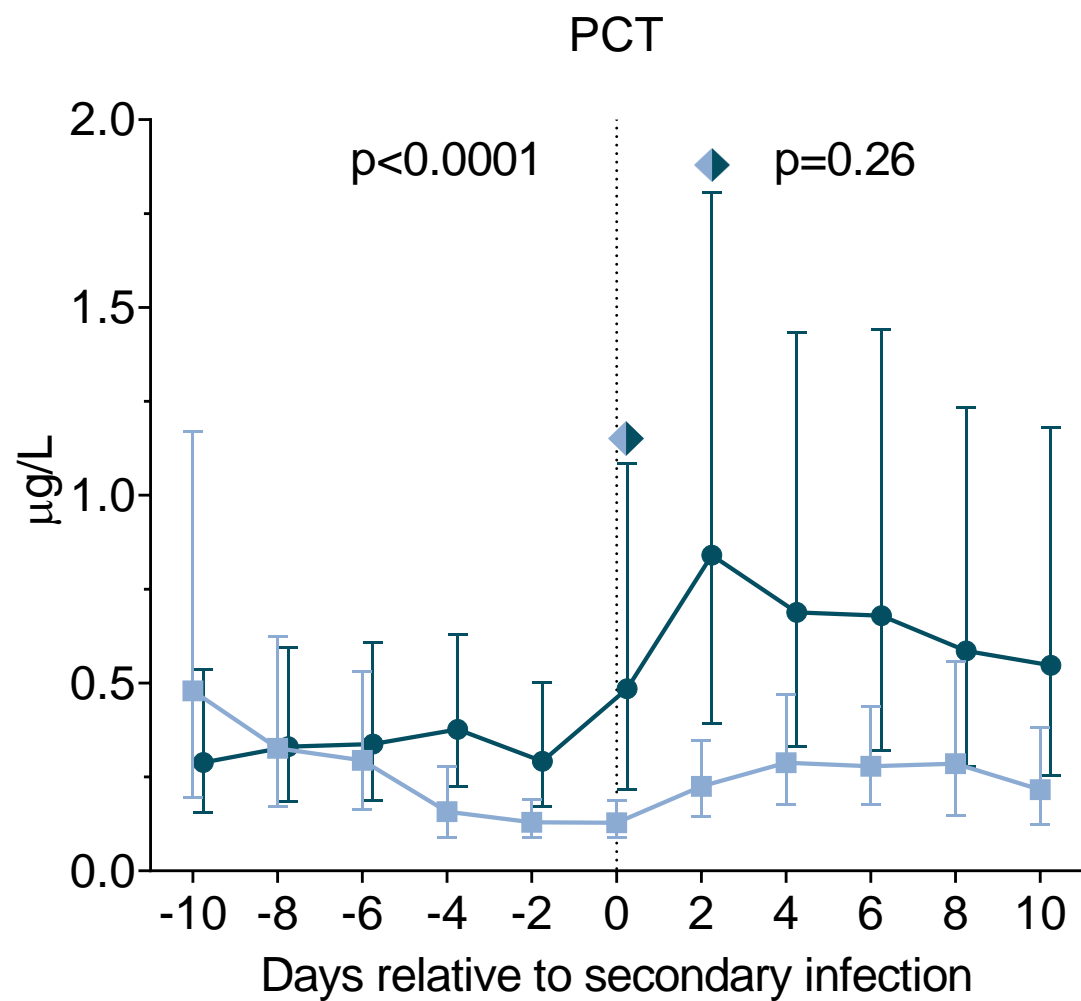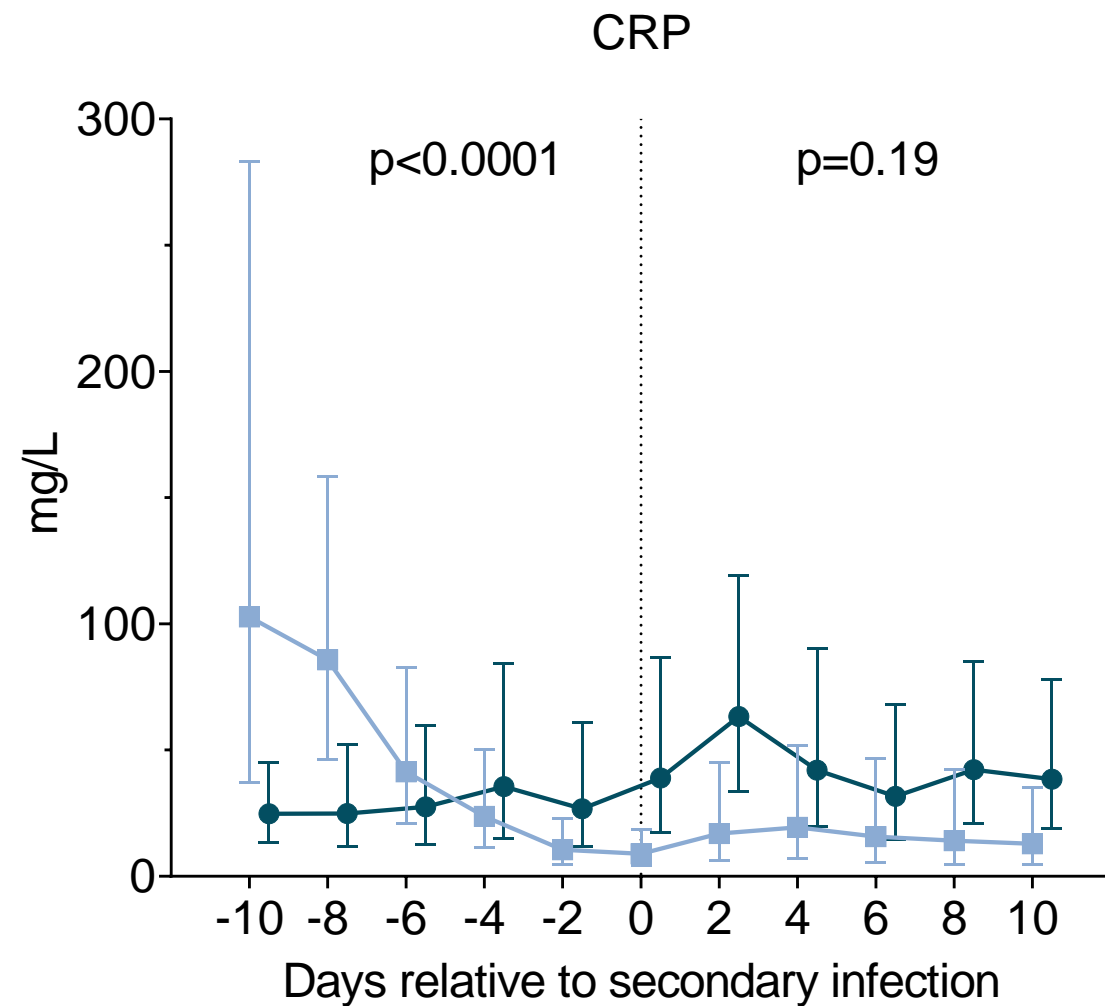

Supplement: MOESM2 [file 19546206]
